# Supplementary material
Source: ML conference proceedings conference paper supplement (https://openaccess.thecvf.com/content/CVPR2024/html/Liang_CapHuman_Capture_Your_CVPR_2024_paper.html)
Supplement: Supplementary file 1 [file Liang_CapHuman_Capture_Your_CVPR_2024_supplemental.pdf]

# CapHuman: Capture Your Moments in Parallel Universes

## Supplementary Material

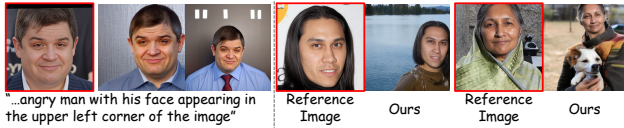

Figure I. **Left:** The detailed prompt struggles to control the head position and facial expression. **Right:** Maintain the hairstyle.

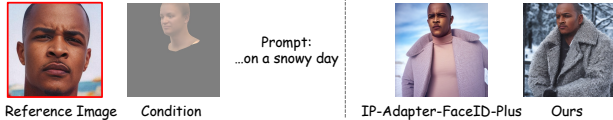

Figure II. **Visual comparison with IP-Adapter.** Our method shows better ID preservation and head control while following the given prompt.

### A. More Qualitative Results

**Can the detailed prompt achieve the head control as well?** In Figure I (Left), we show the detailed prompt still struggles to control the human head, *e.g.* position, and facial expression.

**Maintain the hairstyle.** In Figure I (Right), we show that our model can keep the hairstyle via minor modifications, that is, keep the hair area in the ID features and masks.

**Visual comparison with IP-Adapter.** As shown in Figure II, we compare our method with IP-Adapter [15]. Our method shows better ID preservation and head control while following the given prompt.

**Visual comparisons.** We show more visual comparisons with the established baselines [9–12, 14] in Figure IV. Our CapHuman can generate well-identity-preserved, photo-realistic, and high-fidelity portraits with various head positions and poses in different contexts.

**Facial expression control.** In Figure V, we provide more examples, demonstrating the facial expression control ability of our CapHuman.

### B. More Quantitative Results

**More reference images.** We compare our method with fine-tuning methods that take more reference images as input. The results are presented in Table I. Our method still outperforms LoRA [10] and DreamBooth [12] with better identity preservation and shorter personalization time.

| Method          | #ref. | ↑ ID sim.     | ↓ Personalization time (s) |
|-----------------|-------|---------------|----------------------------|
| LoRA [10]       | 5     | 0.6298        | 1223                       |
| DreamBooth [12] | 5     | 0.7457        | 1321                       |
| Ours            | 1     | <b>0.8429</b> | <b>7</b>                   |

Table I. **Comparisons with fine-tuning methods with more reference images.** Ours still outperforms other baselines with higher identity similarity and faster speed.

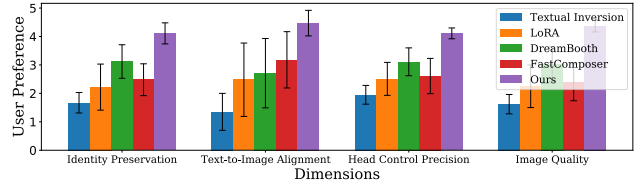

Figure III. **User Study.** Users prefer our method in all four dimensions: identity preservation, text-to-image alignment, head control precision, and image quality.

| Method                      | ↑ ID sim.     | ↑ CLIP score  | ↑ Prompt acc. | ↓ Shape       | ↓ Pose        | ↓ Exp.        | ↓ Light.      |
|-----------------------------|---------------|---------------|---------------|---------------|---------------|---------------|---------------|
| IP-Adapter-FaceID-Plus [15] | 0.8125        | 0.2056        | 61.01%        | 0.1293        | 0.0641        | 0.1519        | 0.1447        |
| Ours                        | <b>0.8363</b> | <b>0.2256</b> | <b>74.17%</b> | <b>0.1020</b> | <b>0.0436</b> | <b>0.1241</b> | <b>0.0965</b> |

Table II. **Comparison with IP-Adapter.** Our method outperforms IP-Adapter in all aspects.

**User Study.** We invite 50 users to score 20 groups of results from each method in terms of the following four dimensions: identity preservation, text-to-image alignment, head control precision, and image quality. Figure III shows our method is much more preferred by the users.

**Comparison with IP-Adapter.** We compare our method with IP-Adapter [15]. The results are presented in Table II. Our method outperforms IP-Adapter [15] in all aspects.

**Ablation on the global ID feature.** For the choice of the global ID feature, we compare FaceNet [13] and ArcFace [7]. **FaceNet** outperforms **ArcFace**. The ID similarity is **0.8367 (0.8091)** measured by FaceNet and **0.4819 (0.4737)** measured by ArcFace.

### C. More Applications

**Stylization by adaptation to other pre-trained models.** Benefitting from the nature of open-source in the community, we can inherit the rich pre-trained models. Our CapHuman can be adapted to other pre-trained models [1–4] in the community flexibly, which can generate identity-preserved portraits with various head positions, poses, and facial expressions in different styles. More results are presented in Figure VI, VII, VIII, and IX.

**Stylization by style prompts.** We also showcase portraits with different styles driven by style prompts in Figure X.

**Multi-Human image generation.** Our CapHuman supports multi-human image generation. The generated results are presented in Figure XI.

**Simultaneous head and body control.** Combined with the pose-guided ControlNet [16], our CapHuman can control the head and the body simultaneously with identity preservation. More results are presented in Figure XII.

**Photo ID generation.** Photo ID is widely used in passports, ID cards, etc. There are typically some requirements for these photos, *e.g.* plain background, formal wearing, and standard head pose. As shown in Figure XIII, our CapHuman can generate standard ID photos by adjusting the head conditions and providing the proper prompts conveniently.

## D. HumanIPHC Benchmark Details

We introduce more details about our HumanIPHC benchmark in this section.

**ID split.** 100 IDs used in our benchmark are listed in Table III.

**Prompts.** We list the prompts used in the benchmark:

- a photo of a person.
- a photo of a person with red hair.
- a photo of a person standing in front of a lake.
- a photo of a person holding a dog.
- a photo of a person running on a rainy day.
- a closeup of a person playing the guitar.
- a photo of a person wearing a suit on a snowy day.
- a photo of a person playing basketball.
- a photo of a person wearing a scarf.
- a photo of a person on a cobblestone street.
- a photo of a person with a sheep in the background.
- a photo of a person sitting on a purple rug in a forest.
- a photo of a person with a tree and autumn leaves in the background.
- a photo of a person with the Eiffel Tower in the background.
- a photo of a person wearing a red sweater.
- a photo of a person wearing a spacesuit.
- a photo of a person wearing a green coat.
- a photo of a person wearing a blue hoodie.
- a photo of a person wearing a santa hat.
- a photo of a person wearing a yellow shirt.
- a photo of a person with a city in the background.
- a photo of a person with a mountain in the background.
- a photo of a person on the beach.
- a photo of a person in the jungle.
- a photo of a person riding a horse.
- a photo of a person holding a bottle of a red wine.

- a photo of a person swimming in the pool.
- a photo of a person holding flowers.
- a photo of a person with a cat.
- a photo of a person reading a book.
- a photo of a person in a chief outfit.
- a photo of a person in a police outfit.
- a photo of a person in a firefighter outfit.
- a photo of a person in a purple wizard outfit.
- a photo of a person wearing a necklace.

**Head conditions.** In Figure XIV, we show the head conditions of a specific individual in our benchmark, including Surface Normals, Albedos, and Lambertian renderings.

## E. User Study Details

We asked the participants to fill out the questionnaires. Every participant is required to score for each question. The score ranges from 1 to 5. The questions are listed as follows:

- Given the reference image and generated image, score for the identity similarity. (1: pretty dissimilar, 5: pretty similar).
- Given the text prompt and generated image, score for the text-to-image alignment. (1: the image is pretty inconsistent with the text prompt, 5: the image is pretty consistent with the text prompt).
- Given the reference image, head condition, and generated image, score for the head control precision from the view of the shape, pose, position, lighting, and facial expression. (1: pretty bad, 5: pretty good).
- Given the generated image, score for the image quality. (1: pretty far away from the real image, 5: pretty close to the real image).

## F. Limitations and Social Impact

**Limitations.** Although our proposed method can achieve promising generative results, it still has several limitations. Our basic generative capabilities come from the pre-trained model, suggesting that our model might fail to generate the scenario out of the pre-training distribution. On the other hand, our 3D facial representation reconstruction relies on the estimation accuracy of DECA [8]. We find it struggles for some extreme poses and facial expressions. This can cause the misalignment of our generated images and the expected head conditions in some cases. Besides, the text richness is limited in our training data. It might be the reason that the text-to-image alignment performance degrades after training. Utilizing permissioned internet data might help alleviate this issue. We leave it for future research.

**Social Impact.** Generative AI has drawn exceptional attention in recent years. Our research aims to provide an ef-

fective tool for human-centric image synthesis, especially for portrait personalization with head control in a flexible, fine-grained, and 3D-consistent manner. We believe it will play an important role in many potential entertainment applications. Like other existing generative methods, our method is susceptible to the bias from the large pre-trained dataset as well. Some malicious parties might have the potential to exploit this vulnerability for bad purposes. We encourage future research to address this concern. Besides, our model is at risk of abuse, *e.g.* synthesizing politically relevant images. This risk can be mitigated by some deepfake detection methods [5, 6] or by controlling the release of the model strictly.

## References

- [1] Realistic vision v3.0. [https://huggingface.co/SG161222/Realistic\\_Vision\\_V3.0\\_VAE](https://huggingface.co/SG161222/Realistic_Vision_V3.0_VAE), 2023. **1, 4**
- [2] comic-babes. <https://civitai.com/models/20294/comic-babes>, 2023.
- [3] disney-pixar-cartoon. <https://civitai.com/models/65203/disney-pixar-cartoon-type-a>, 2023.
- [4] toonyou. <https://civitai.com/models/30240/toonyou>, 2023. **1**
- [5] Agil Aghasanli, Dmitry Kangin, and Plamen Angelov. Interpretable-through-prototypes deepfake detection for diffusion models. In *ICCV*, pages 467–474, 2023. **3**
- [6] Riccardo Corvi, Davide Cozzolino, Giada Zingarini, Giovanni Poggi, Koki Nagano, and Luisa Verdoliva. On the detection of synthetic images generated by diffusion models. In *ICASSP*, pages 1–5, 2023. **3**
- [7] Jiankang Deng, Jia Guo, Niannan Xue, and Stefanos Zafeiriou. Arcface: Additive angular margin loss for deep face recognition. In *CVPR*, pages 4690–4699, 2019. **1**
- [8] Yao Feng, Haiwen Feng, Michael J. Black, and Timo Bolkart. Learning an animatable detailed 3D face model from in-the-wild images. *ACM Transactions on Graphics, (Proc. SIGGRAPH)*, 40(8), 2021. **2**
- [9] Rinon Gal, Yuval Alaluf, Yuval Atzmon, Or Patashnik, Amit Haim Bermano, Gal Chechik, and Daniel Cohen-or. An image is worth one word: Personalizing text-to-image generation using textual inversion. In *ICLR*, 2023. **1**
- [10] Edward J Hu, Yelong Shen, Phillip Wallis, Zeyuan Allen-Zhu, Yuanzhi Li, Shean Wang, Lu Wang, and Weizhu Chen. Lora: Low-rank adaptation of large language models. *arXiv preprint arXiv:2106.09685*, 2021. **1**
- [11] Robin Rombach, Andreas Blattmann, Dominik Lorenz, Patrick Esser, and Björn Ommer. High-resolution image synthesis with latent diffusion models. In *CVPR*, pages 10684–10695, 2022.
- [12] Nataniel Ruiz, Yuanzhen Li, Varun Jampani, Yael Pritch, Michael Rubinstein, and Kfir Aberman. Dreambooth: Fine tuning text-to-image diffusion models for subject-driven generation. In *CVPR*, pages 22500–22510, 2023. **1**
- [13] Florian Schroff, Dmitry Kalenichenko, and James Philbin. Facenet: A unified embedding for face recognition and clustering. In *CVPR*, pages 815–823, 2015. **1**
- [14] Guangxuan Xiao, Tianwei Yin, William T. Freeman, Frédo Durand, and Song Han. Fastcomposer: Tuning-free multi-subject image generation with localized attention. *arXiv*, 2023. **1**
- [15] Hu Ye, Jun Zhang, Sibio Liu, Xiao Han, and Wei Yang. Ip-adapter: Text compatible image prompt adapter for text-to-image diffusion models. 2023. **1**
- [16] Lvmin Zhang, Anyi Rao, and Maneesh Agrawala. Adding conditional control to text-to-image diffusion models. In *ICCV*, 2023. **2, 12**



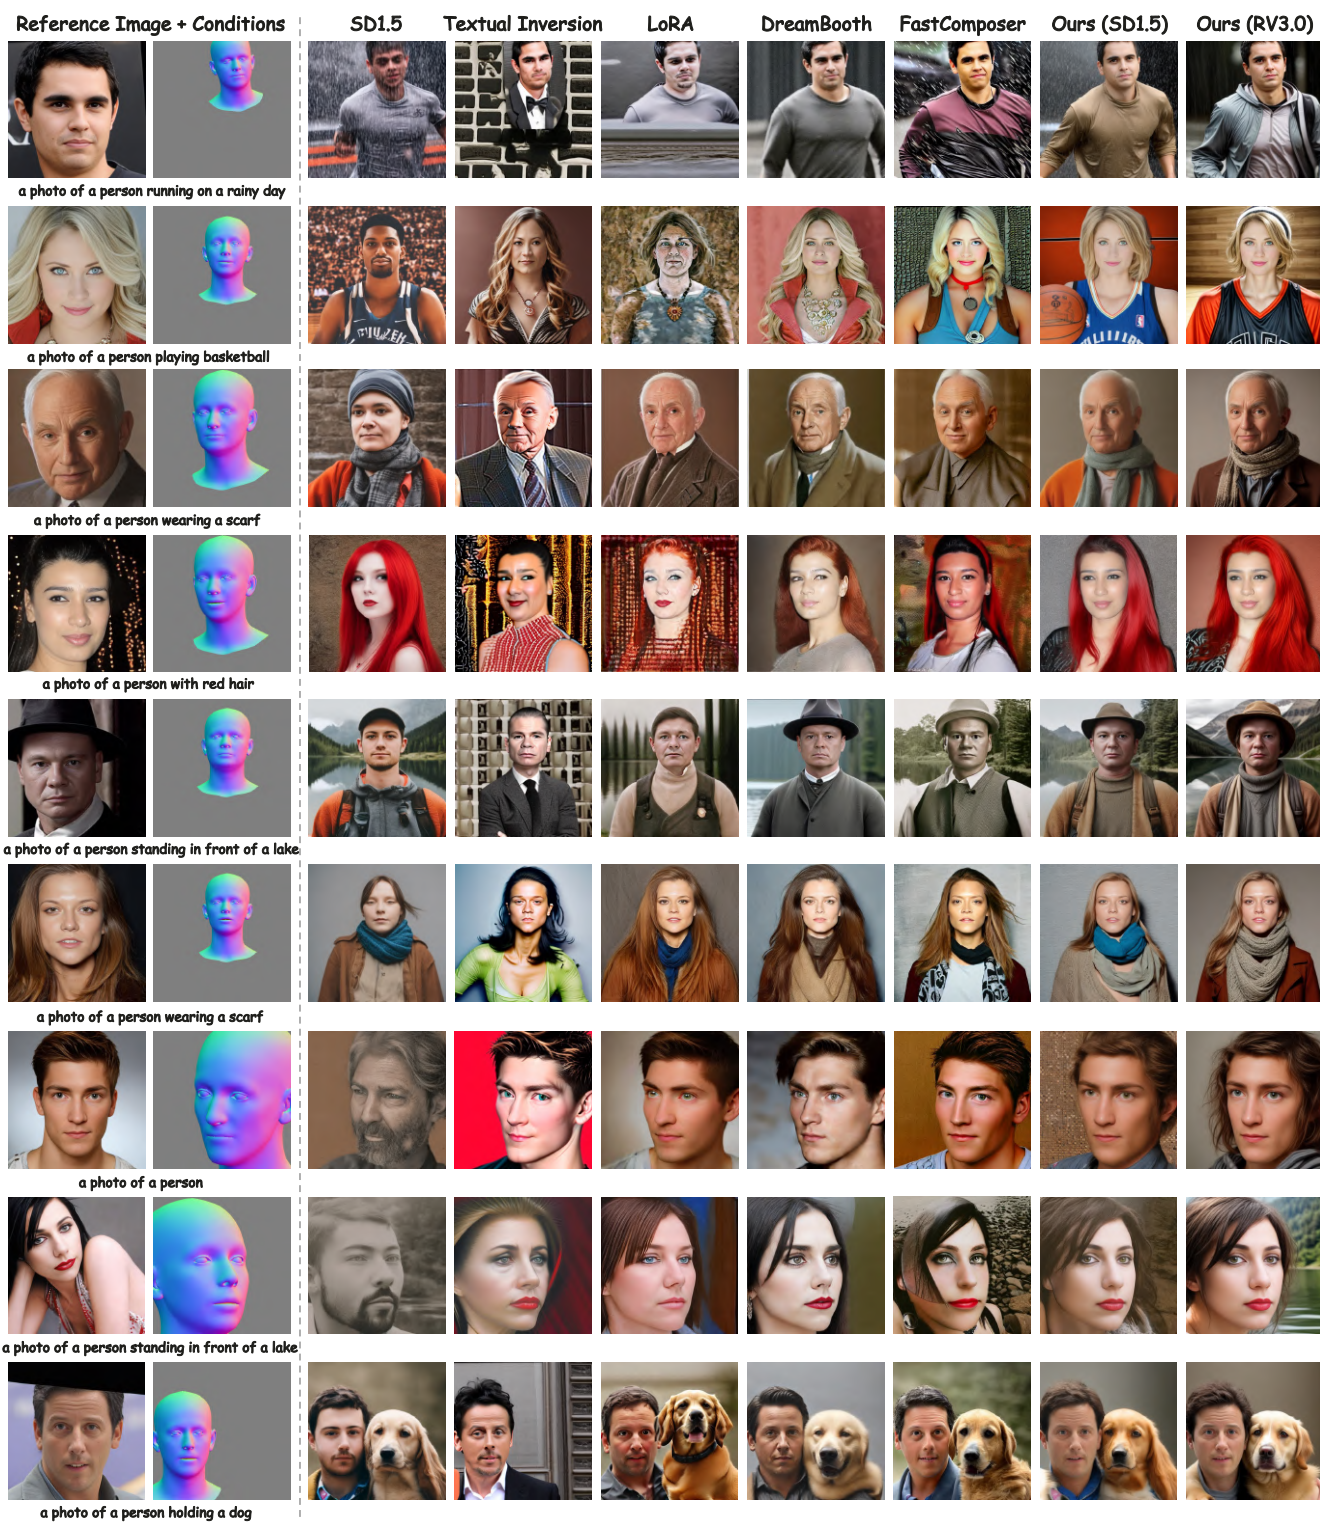

Figure IV. **More qualitative results.** Our CapHuman can produce well-identity-preserved, photo-realistic, and high-fidelity portraits with various head positions and poses in different contexts, compared with the baselines. Note that our model can be combined with other pre-trained models, *e.g.* RealisticVision [1] in the community flexibly. For the head condition, we only display the Surface Normal here.



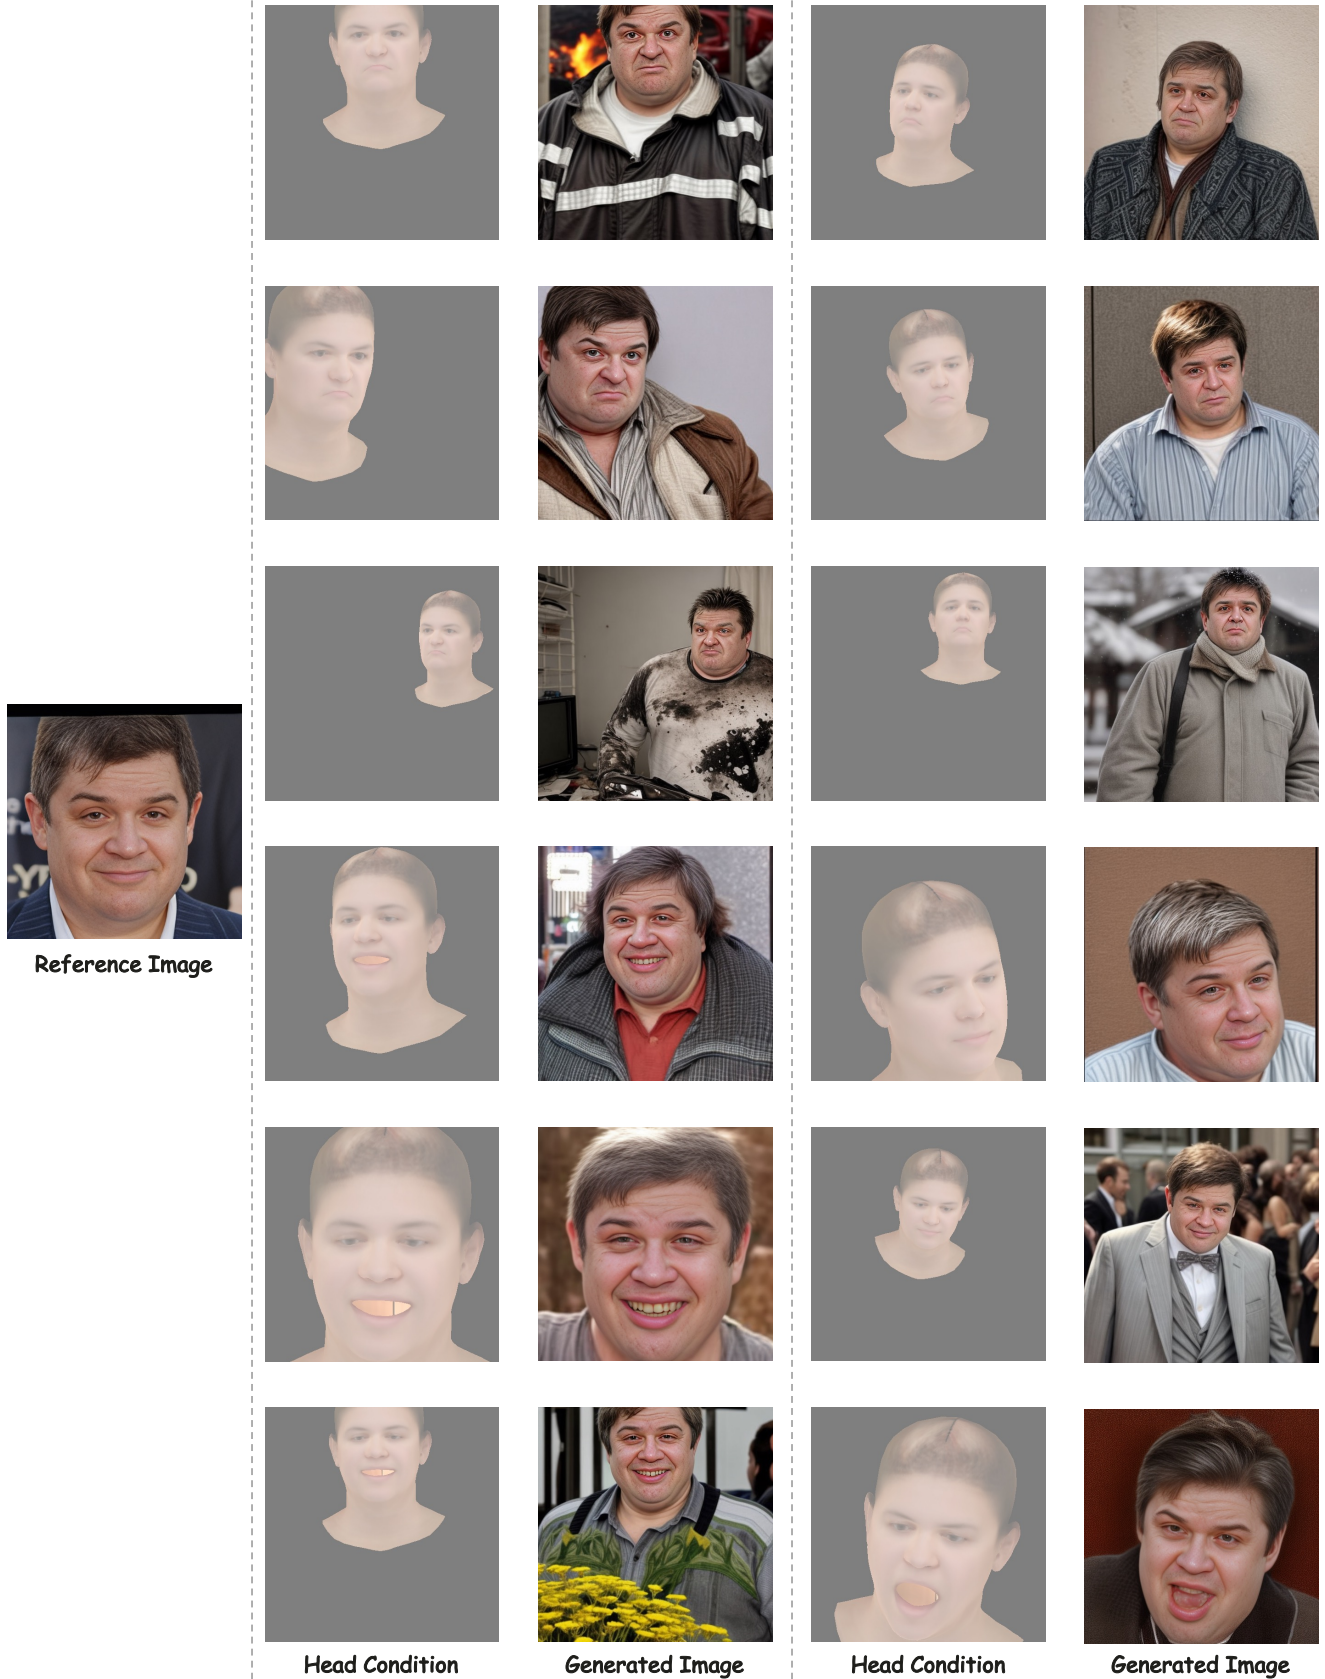

Figure V. More results with different and rich facial expressions. Our CapHuman can provide facial expression control in a flexible and fine-grained manner.

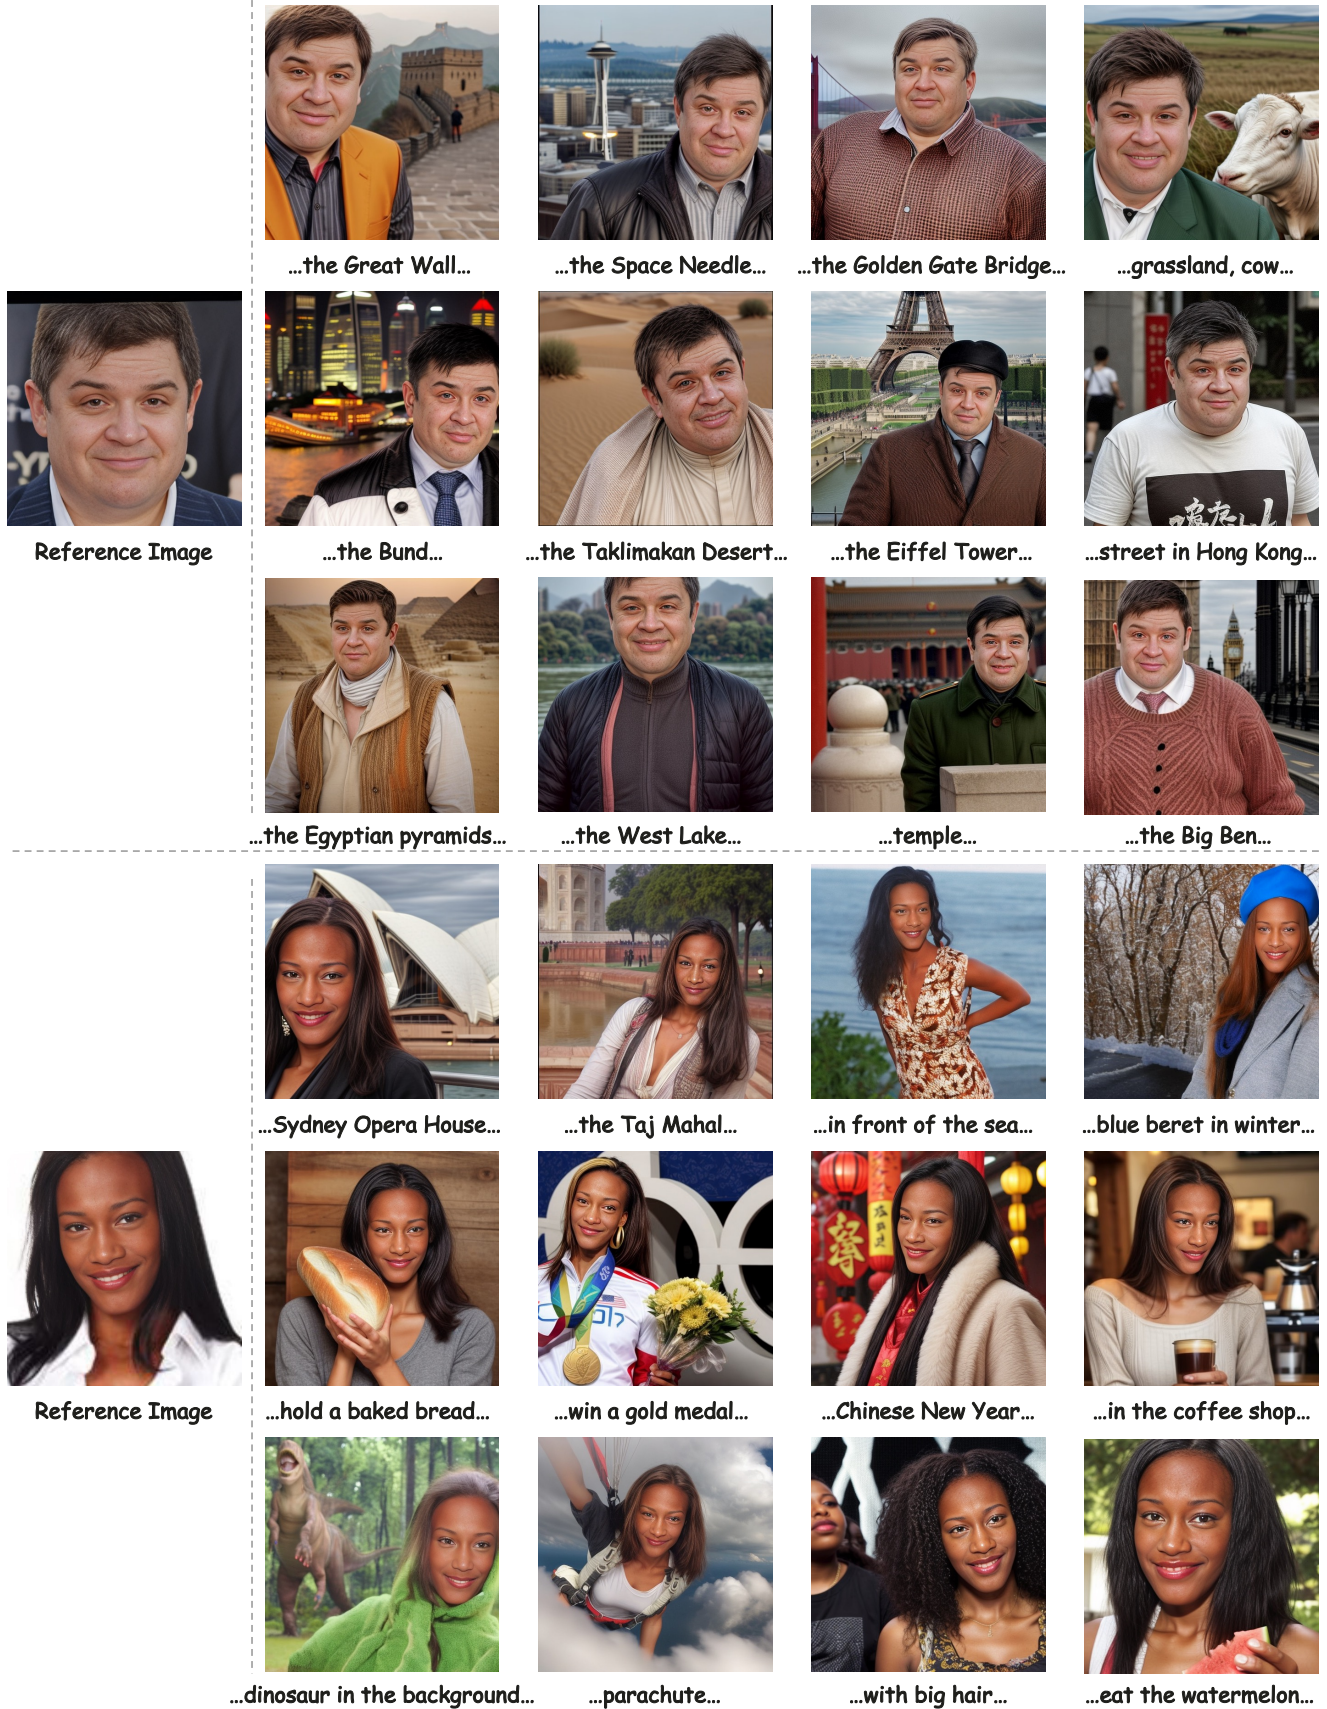

Figure VI. More results in the realistic style. Our CapHuman can be adapted to produce various identity-preserved and photo-realistic portraits with diverse head positions, poses, and facial expressions.



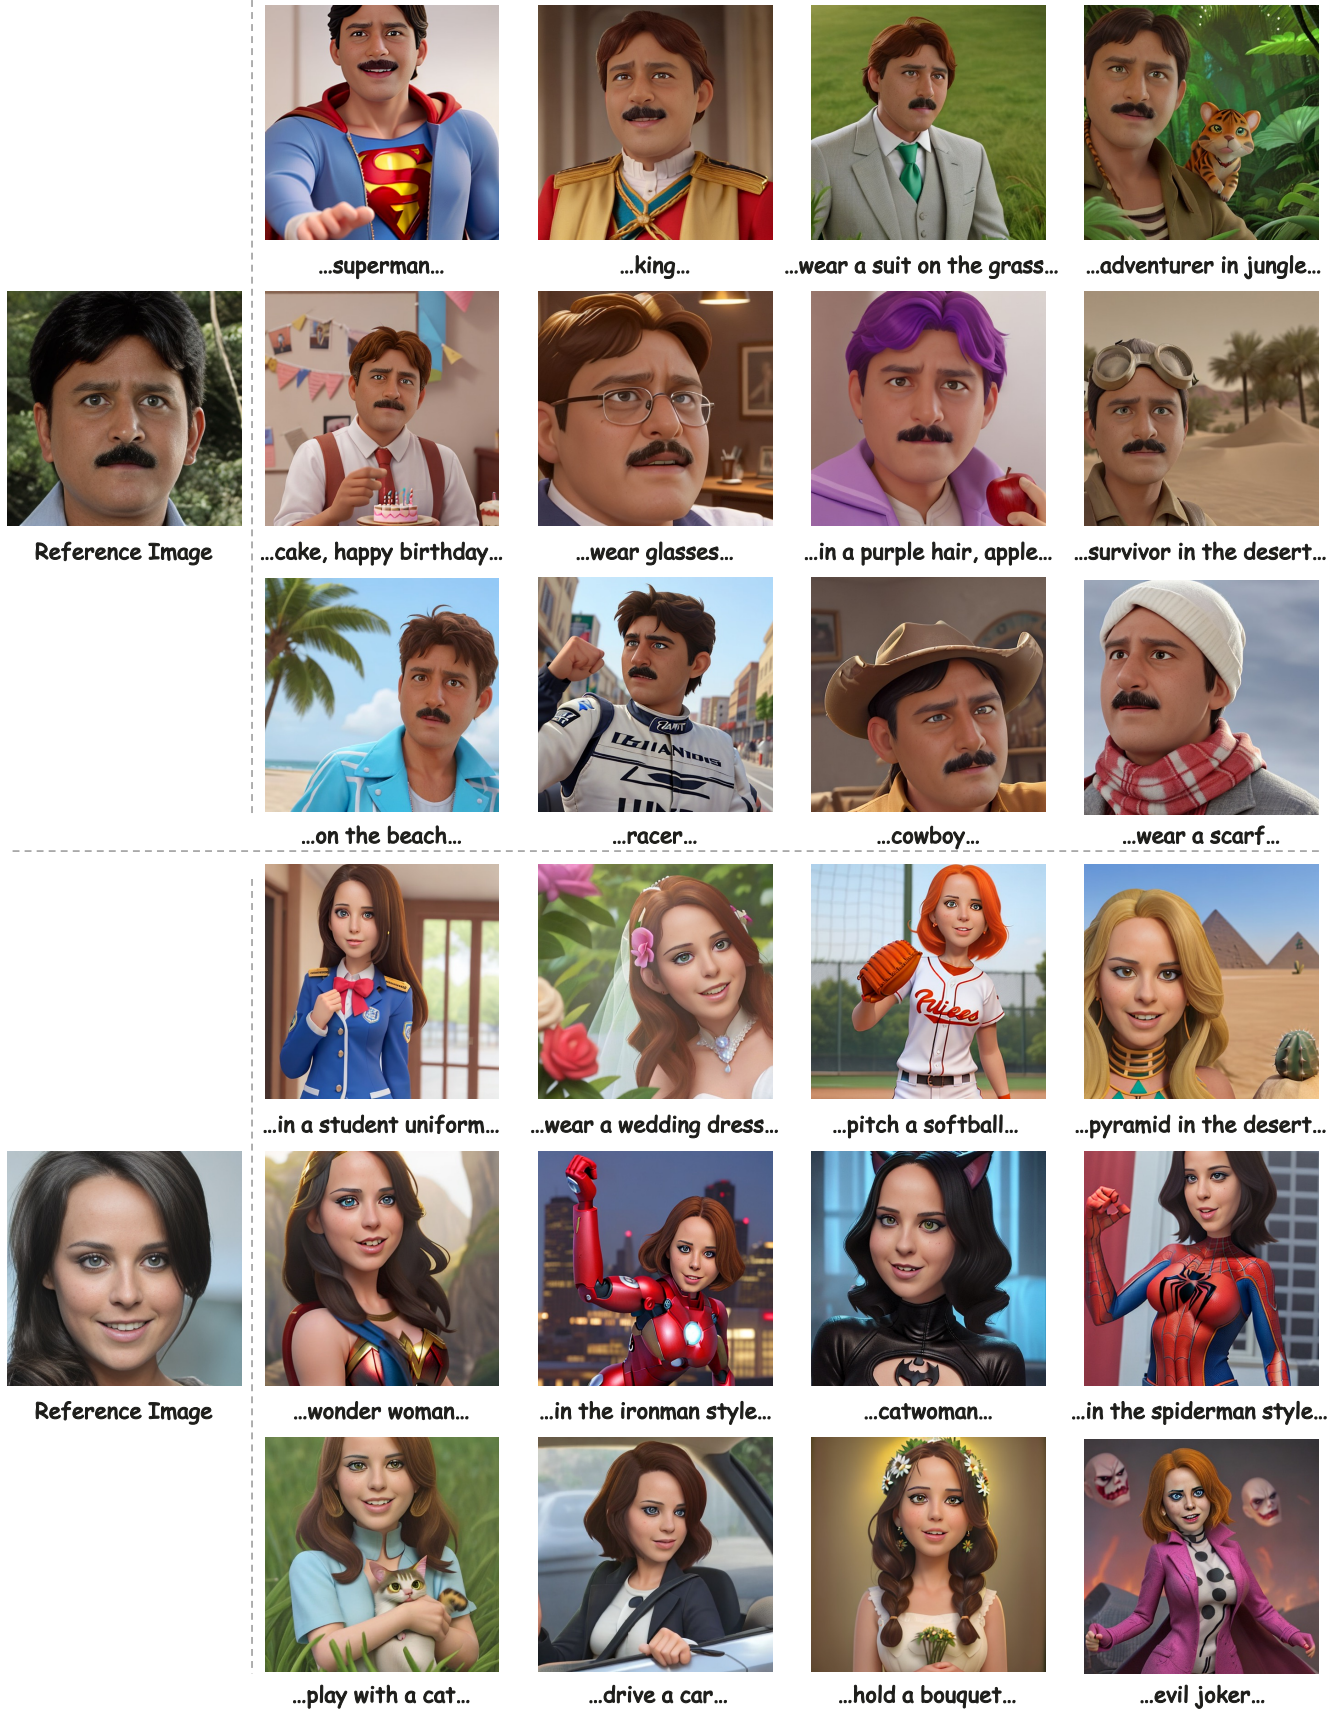

Figure VII. More results in the Disney cartoon style. Our CapHuman can be adapted to produce various identity-preserved portraits with diverse head positions, poses, and facial expressions.



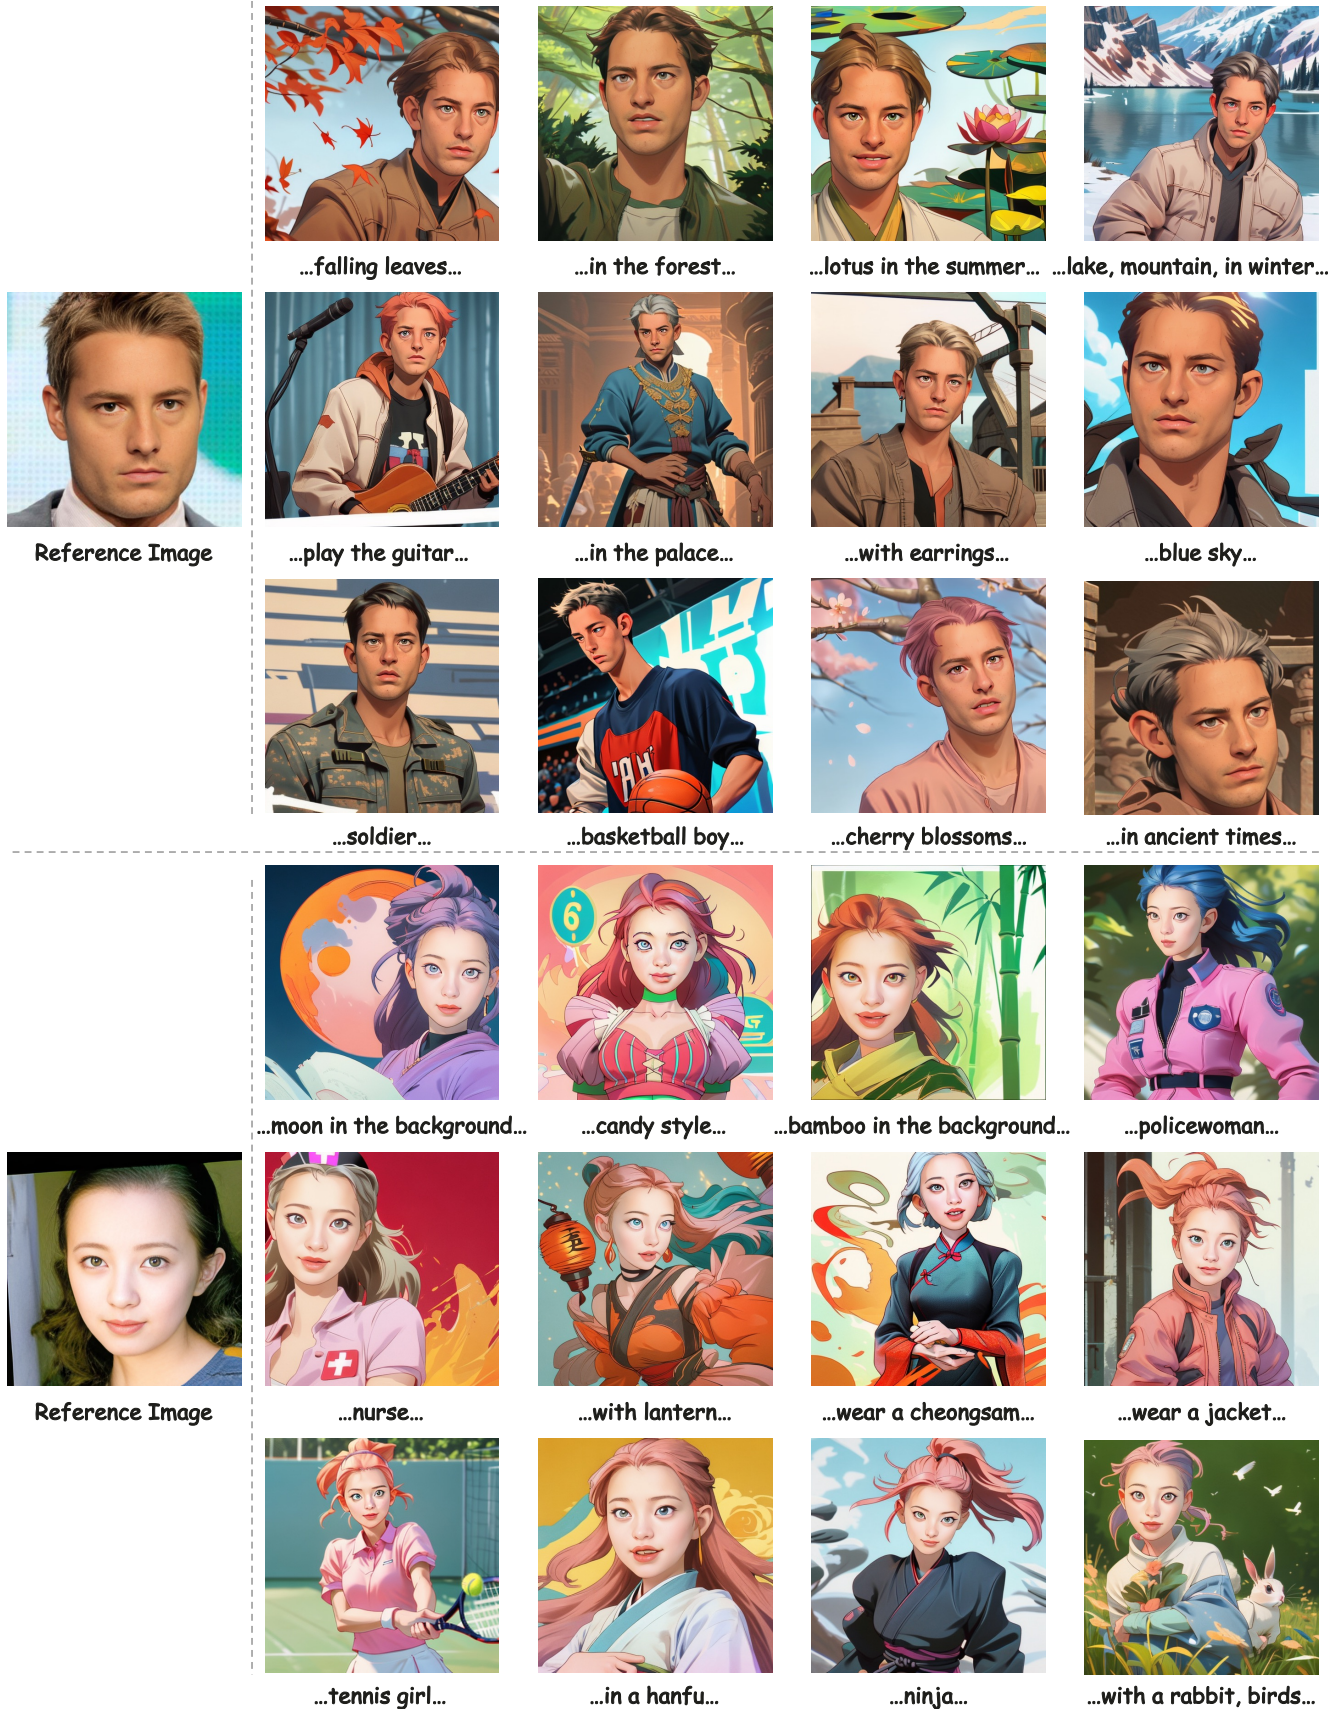

Figure VIII. More results in the animation style. Our CapHuman can be adapted to produce various identity-preserved portraits with diverse head positions, poses, and facial expressions.



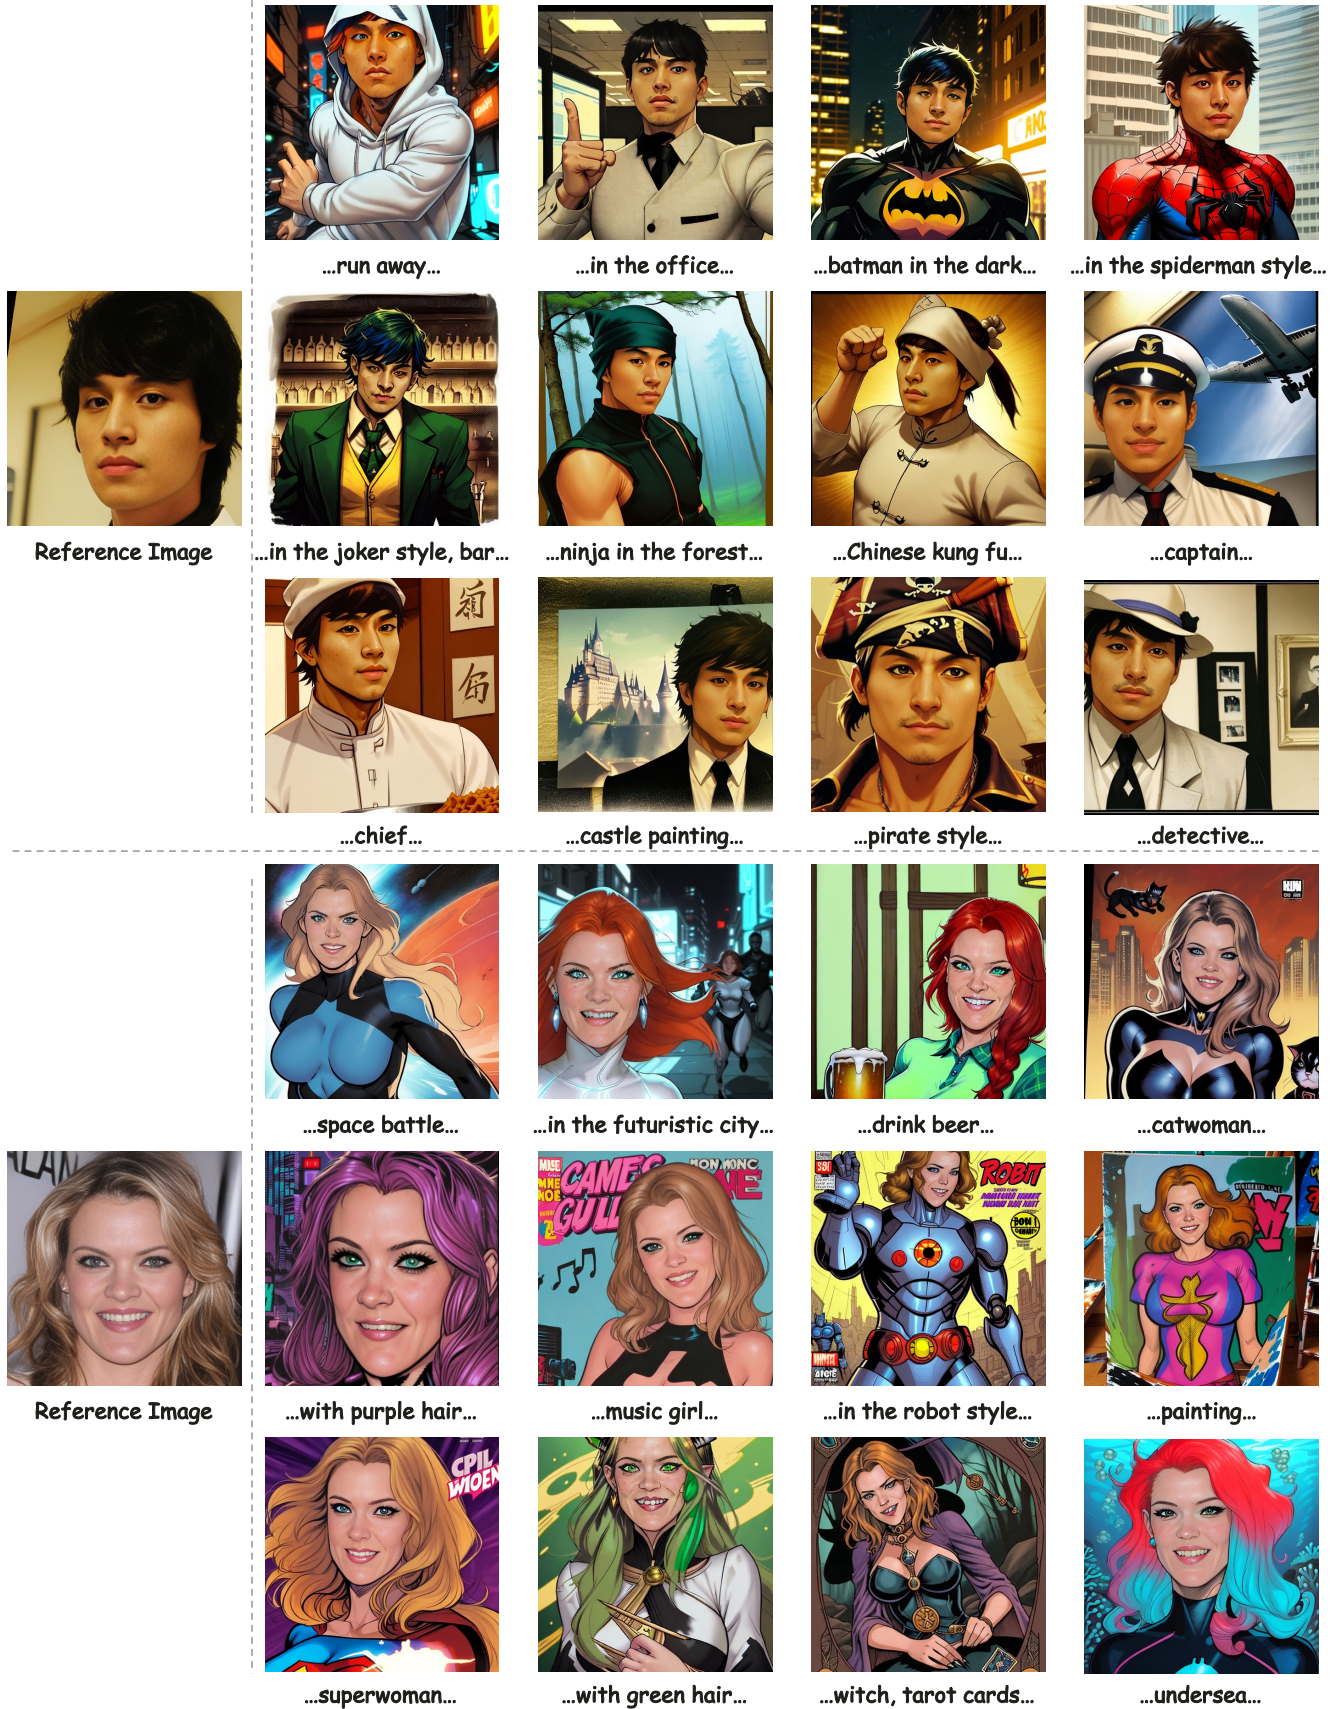

Figure IX. More results in the comic style. Our CapHuman can be adapted to produce various identity-preserved portraits with diverse head positions, poses, and facial expressions.



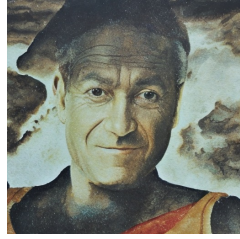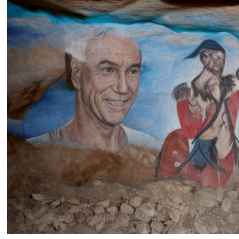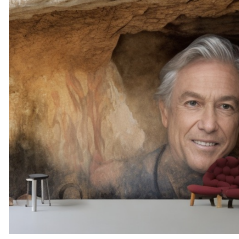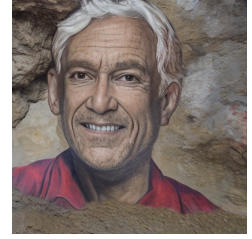

Cave mural style

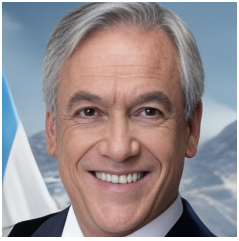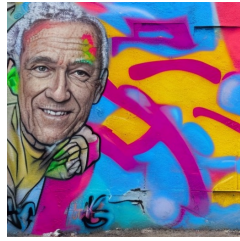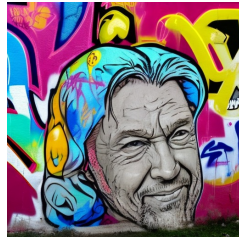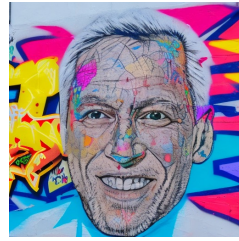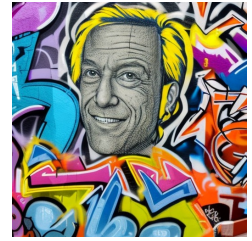

Colorful graffiti style

Reference Image

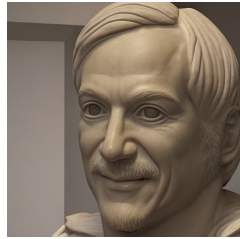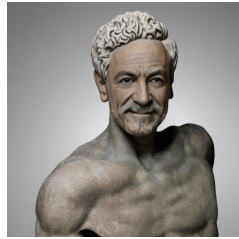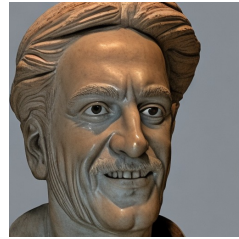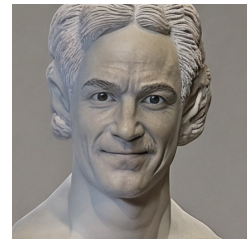

Greek sculpture style

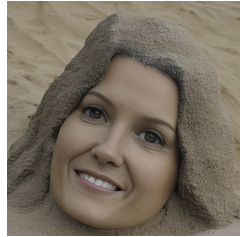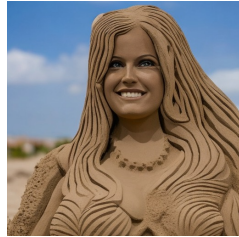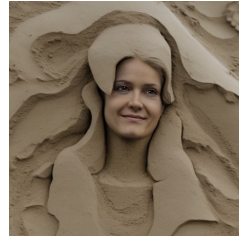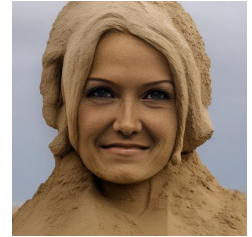

Sand sculpture style

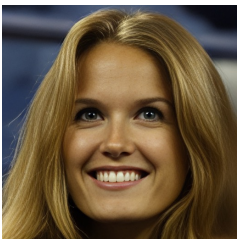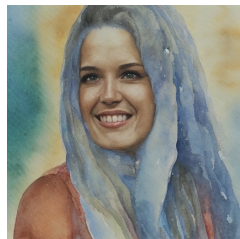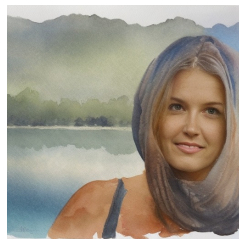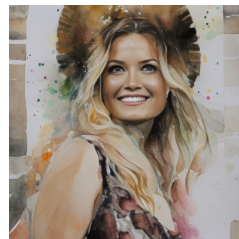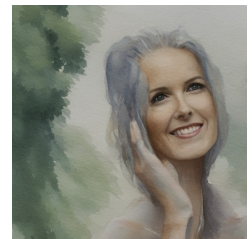

Watercolor painting style

Reference Image

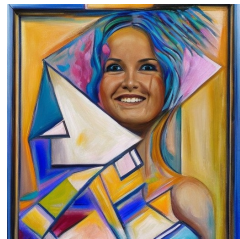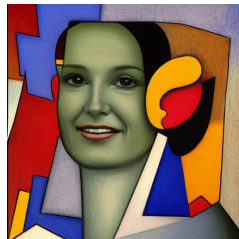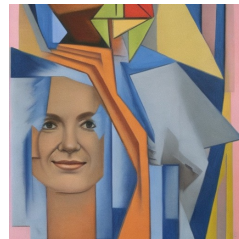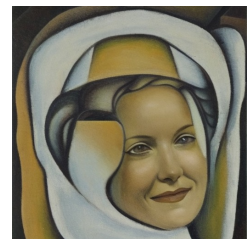

Cubism painting style

Figure X. Stylization by style prompts. Our CapHuman can generate identity-preserved portraits with different styles by style prompts.



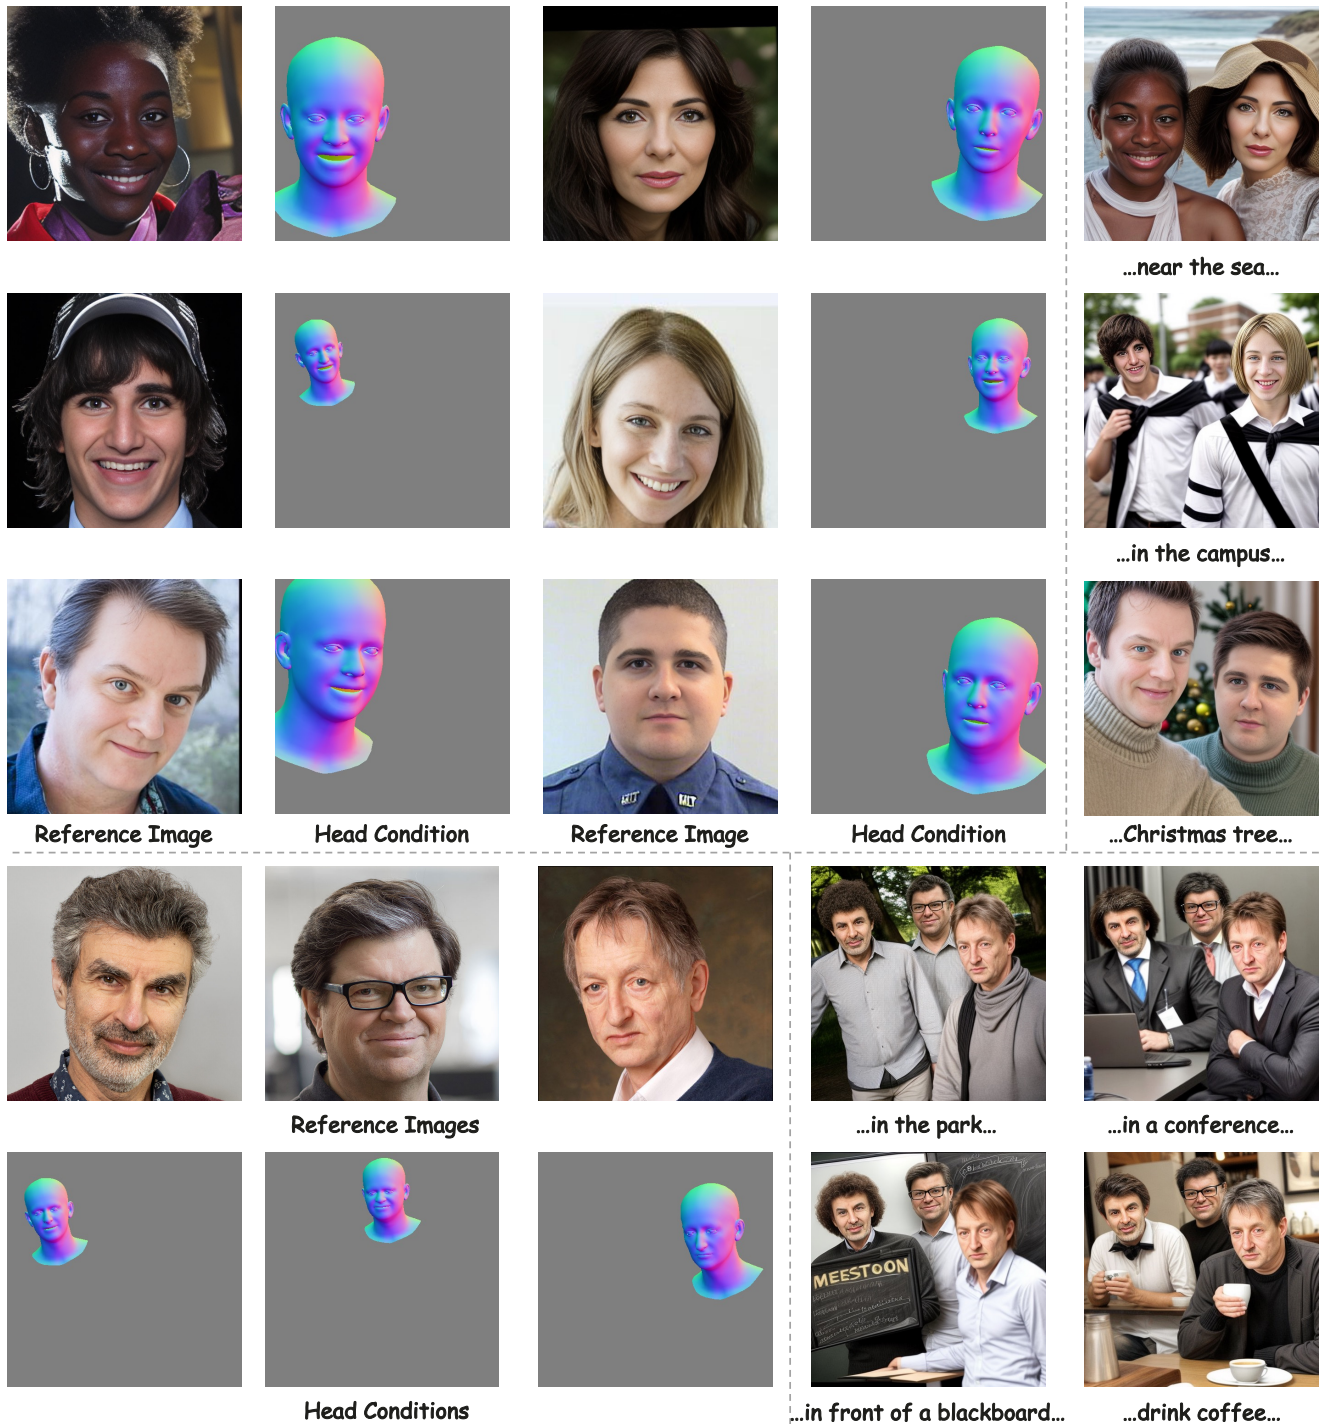

Figure XI. **Multi-Human image generation.** Given reference images, our CapHuman can generate various identity-preserved multi-human images, consistent with the corresponding head conditions.

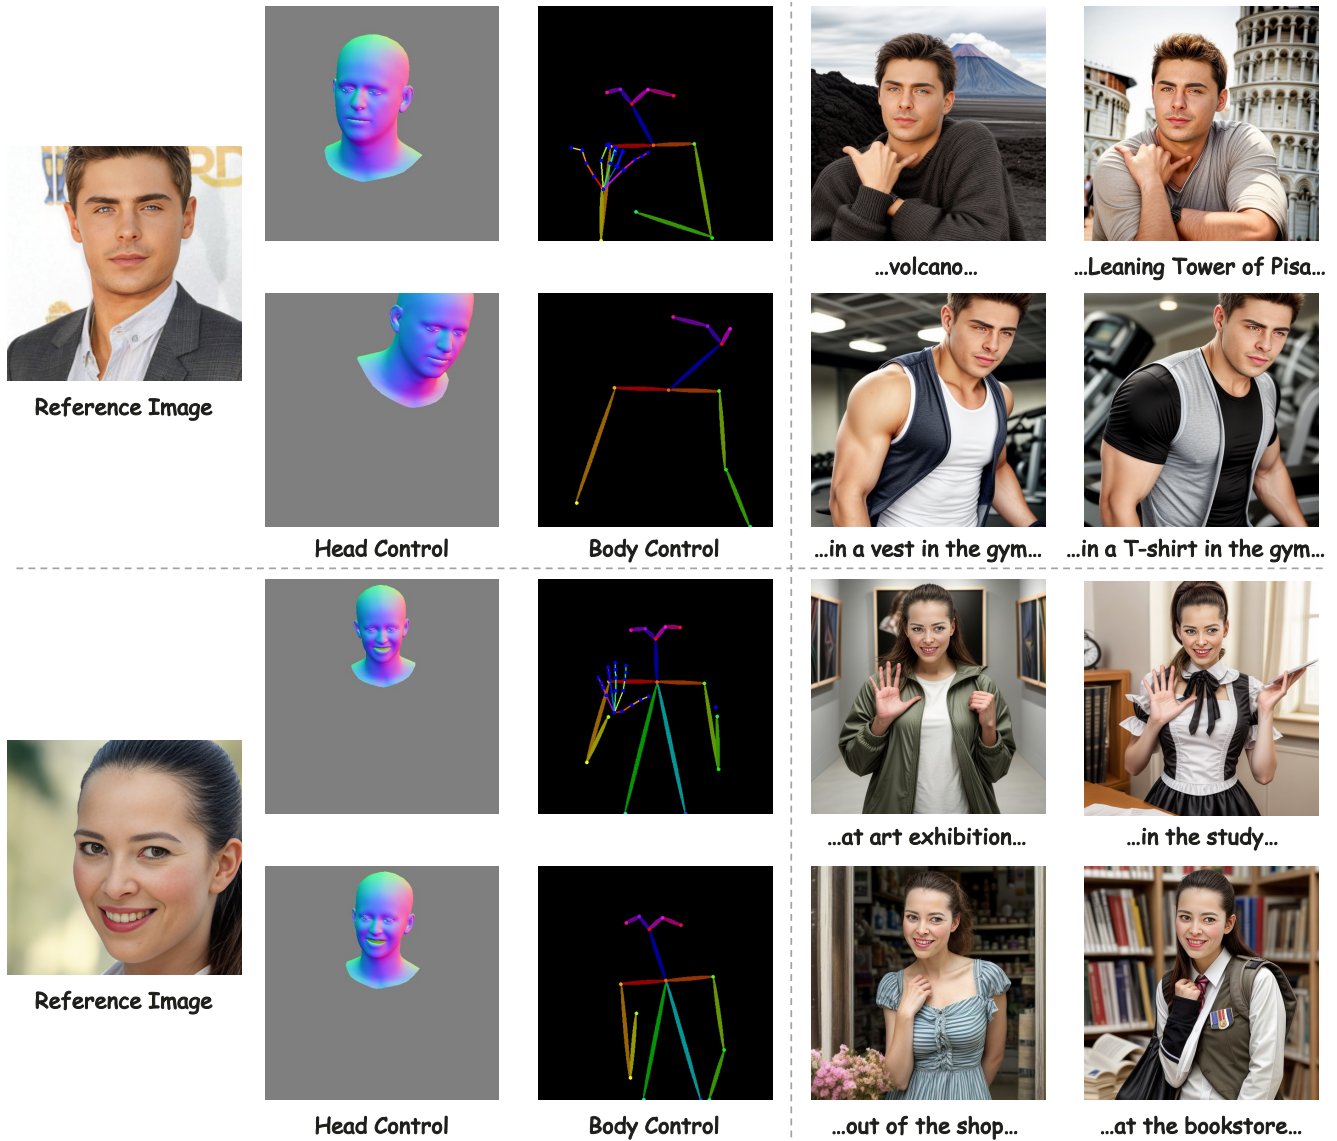

Figure XII. **Simultaneous head and body control with identity preservation.** Our CapHuman can control the head and body simultaneously with the pose-guided ControlNet [16] with identity preservation.

|        |        |        |        |        |        |        |        |        |        |
|--------|--------|--------|--------|--------|--------|--------|--------|--------|--------|
| 182723 | 182765 | 182828 | 182879 | 183243 | 183262 | 183344 | 183401 | 184642 | 184712 |
| 184713 | 184848 | 184858 | 184998 | 185120 | 185758 | 185827 | 186101 | 186436 | 186479 |
| 186538 | 186862 | 186981 | 187031 | 187083 | 187958 | 187990 | 188016 | 188082 | 188346 |
| 188646 | 189420 | 189454 | 189597 | 189635 | 189888 | 189913 | 189930 | 190093 | 190146 |
| 190971 | 190986 | 191153 | 191611 | 191663 | 191847 | 192006 | 192254 | 192279 | 192541 |
| 192816 | 192904 | 193230 | 193793 | 194155 | 194303 | 194309 | 194330 | 194629 | 194656 |
| 195350 | 195514 | 196047 | 196099 | 196205 | 196251 | 196475 | 196824 | 197119 | 197129 |
| 197168 | 197210 | 197464 | 197630 | 197829 | 198143 | 198223 | 198234 | 198413 | 198614 |
| 198869 | 198909 | 199377 | 199538 | 199621 | 199732 | 200305 | 200504 | 200505 | 201191 |
| 201546 | 201703 | 201731 | 201737 | 201915 | 201962 | 202244 | 202338 | 202459 | 202515 |

Table III. **ID list.** We list all the IDs used in our HumanIPHC benchmark.

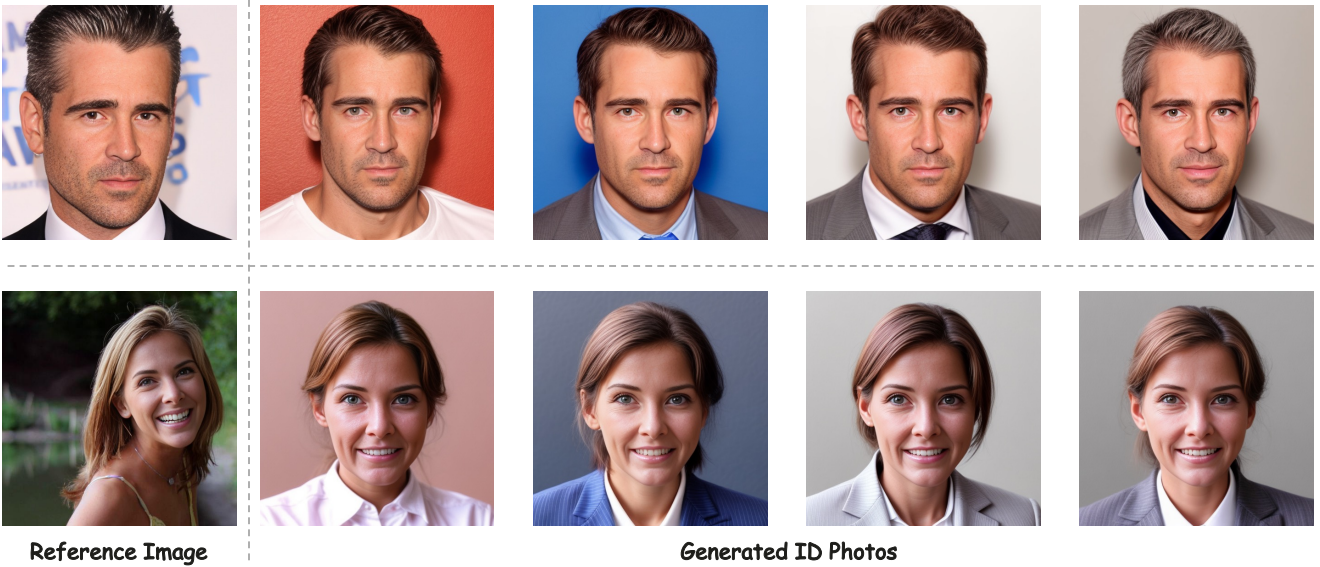

Figure XIII. **Photo ID generation.** Our CapHuman can generate standard ID photos by adjusting the head conditions and providing the proper prompts.



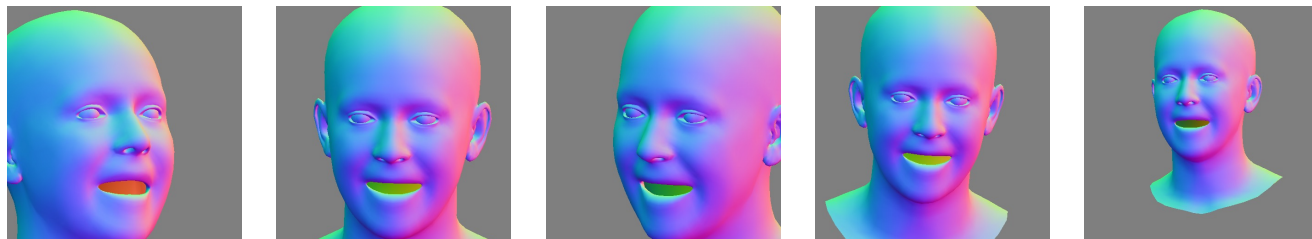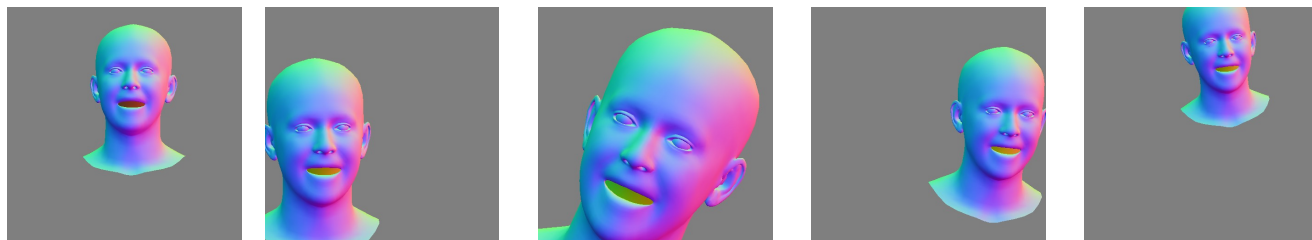

Surface Normals

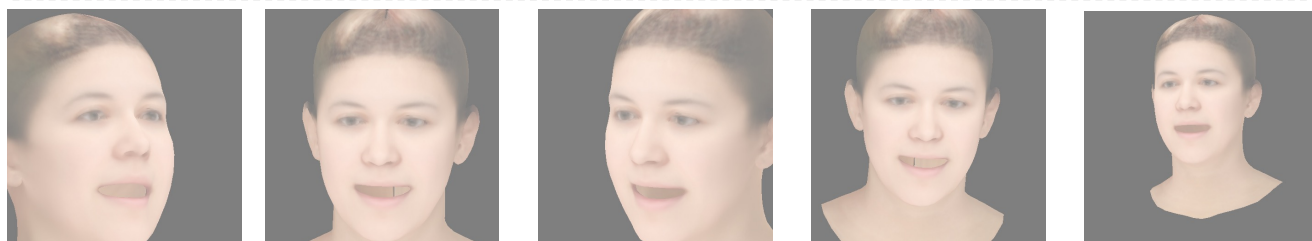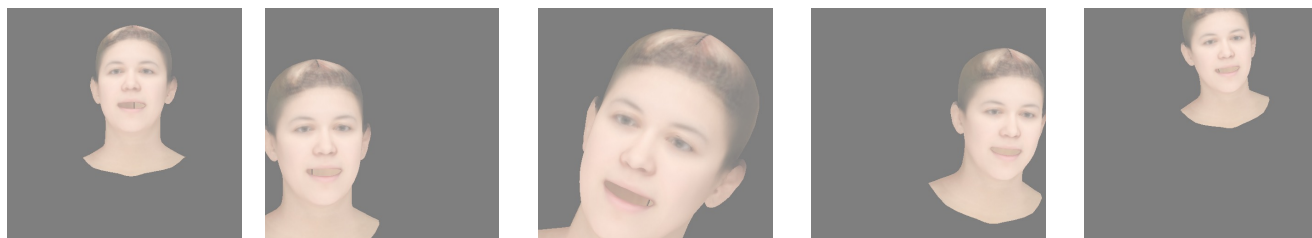

Albedos

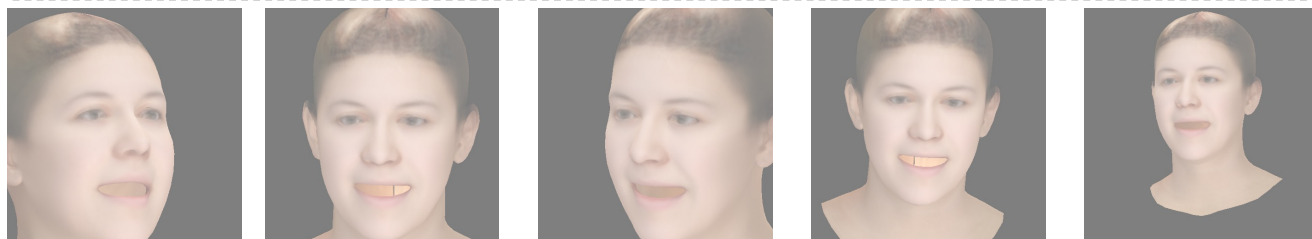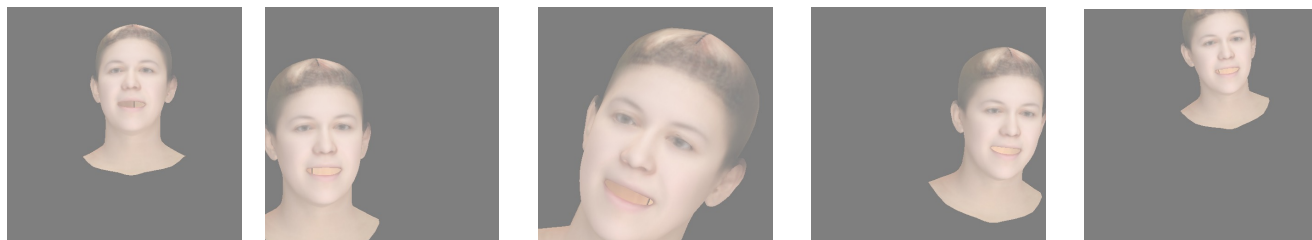

Lambertian renderings

Figure XIV. **Head Conditions.** We list the head conditions of a specific individual in our HumanIPHC benchmark, including Surface Normals, Albedos, and Lambertian renderings.
